# Supplementary material for: omicSynth: An open multi-omic community resource for identifying druggable targets across neurodegenerative diseases
Source: PubMed Central journal article supplement (PMC10806756; doi:10.1016/j.ajhg.2023.12.006), 2024-01-04
Supplement: mmc1.pdf [file mmc1.pdf]

**The American Journal of Human Genetics, Volume 111**

**Supplemental information**

**omicSynth: An open multi-omic community resource  
for identifying druggable targets across  
neurodegenerative diseases**

**Chelsea X. Alvarado, Mary B. Makarious, Cory A. Weller, Dan Vitale, Mathew J. Koretsky, Sara Bandres-Ciga, Hirotaka Iwaki, Kristin Levine, Andrew Singleton, Faraz Faghri, Mike A. Nalls, and Hampton L. Leonard**

# Supplementary Tables Legend

**Table S1: Summary of SMR data mining across diseases.** This table provides a summary of the number of unique genes, genes found to be significant in liver eQTL tissue, eQTL specific genes, number of genes replicated in multi ancestry eQTL data, total number of gene found to be therapeutic/druggable, the percentage of therapeutic genes, total number of non-therapeutic/non-druggable genes, and the percentage of non-therapeutic genes for each diseases. This data is provided at 4 levels, an overall summary of all tested genes and three significance thresholds:  $p_{\text{SMR\_multi}} < 0.05$  &  $p_{\text{HEIDI}} > 0.01$ ,  $p_{\text{SMR\_multi}} < 2.95 \times 10^{-6}$  (testing all protein coding genes) &  $p_{\text{HEIDI}} > 0.01$ , and  $p_{\text{SMR\_multi}} < 1.58 \times 10^{-8}$  (testing all protein coding genes across all omics) &  $p_{\text{HEIDI}} > 0.01$ .

**Table S2: All unfiltered SMR association summary statistics.** Table provides a link to data files for download.

**Table S3: Extended data for candidate genes for multiple neurodegenerative diseases (Table 1).** This table provides extended data for genes with functional inferences passing multiple test correction at a multi-SNP SMR  $P < 2.95 \times 10^{-6}$  for multiple neurodegenerative diseases. We provide details for the most significant \*-omic association detected as well as the most significant single SNP in that set of gene level associations. Additionally, we provide all the omics and diseases in which a given gene has significant associations.

**Table S4: Summary statistics for all significant gene associations.** This table provides summary statistics and SMR results for candidate genes with associations passing multiple test correction at a multi-SNP SMR  $P < 2.95 \times 10^{-6}$ . Columns ending with GWAS and QTL provide values for the tested probe from the source QTL and GWAS summary statistics used in the SMR analyses.

**Table S5: Extended Summaries of candidate genes in three neurodegenerative diseases.** This table provides extended data on candidate genes passing multiple test correction at a multi-SNP SMR  $P < 2.95 \times 10^{-6}$  for three neurodegenerative diseases. We provide summary statistics for each significant association.

**Table S6: Extended Summaries of candidate genes in two neurodegenerative diseases.** This table provides extended data on candidate genes passing multiple test correction at a multi-SNP SMR  $P < 2.95 \times 10^{-6}$  for two neurodegenerative diseases. We provide summary statistics for each significant association.

**Table S7: Summary statistics for candidate genes replicated in multi ancestry data.** This table provides summary statistics for all replicated candidate genes' significant associations across all \*-omics.

**Table S8: Summary statistics for all novel class genes.** This table provides summary statistics of candidate genes classified as *novel*, meaning the gene is considered druggable but does not have NDD specific therapeutics that target the gene. Significant associations for each gene are provided.

**Table S9: Summary statistics for all known class genes.** This table provides summary statistics of candidate genes classified as *known*, meaning that the gene has therapeutics that are approved for use in at least one NDD. We provide all significant associations for each *known* gene.

**Table S10: Summaries of the novel target class of genes including network members.** This table lists all candidate genes that fall into the novel tier in our druggable gene classification scheme. For each gene we provide a summary of how many omics a gene has significant associations in and in which diseases. We identify companion genes for each gene using the Signor database and in bold are genes that have been found to have significant associations in our SMR results (multi-SNP SMRP < 2.95E-06).

**Table S11: Summary statistics for all difficult class genes.** This table provides summary statistics of candidate genes classified as *difficult*, meaning the gene is not currently considered druggable and no therapeutics target the gene.

**Table S12: Summaries of the difficult target class of genes including network members.** This table lists all candidate genes that fall into the difficult tier in our druggable gene classification scheme. For each gene we provide a summary of how many omics a gene has significant associations in and in which diseases. We identify companion genes for each gene using the Signor database and in bold are genes that have been found to have significant associations in our SMR results (multi-SNP SMRP < 2.95E-06). We provide additional information regarding potential liver toxicity issues by cross referencing companion genes against significant associations in the liver omic.

**Table S13: Mean expression percentile ranks in single cell data for multi-NDD gene targets.** This table provides calculated mean expression rank values using snRNA-seq data from Silletti et al. (2022). Mean values for each gene-cell type were obtained by using scRNA-seq values for all cell type specific individual cells for a specific gene.

**Table S14: Median expression percentile ranks in single cell data for multi-NDD gene targets.** This table provides calculated median expression rank values using snRNA-seq data from Silletti et al. (2022). Median values for each gene-cell type were obtained by using scRNA-seq values for all cell type specific individual cells for a specific gene.

**Table S15: Comparison of GPNMB across multiple genetic ancestries.** This table provides basic summary statistics of our GPNMB significant associations in comparison to other GPNMB summary statistics. We summarize data in African American/African admixed, Chinese, and Taiwanese genetic ancestries to confirm that our multi ancestry association direction was consistent with previous findings in other non-European ancestries.

# Supplementary Figure(s)

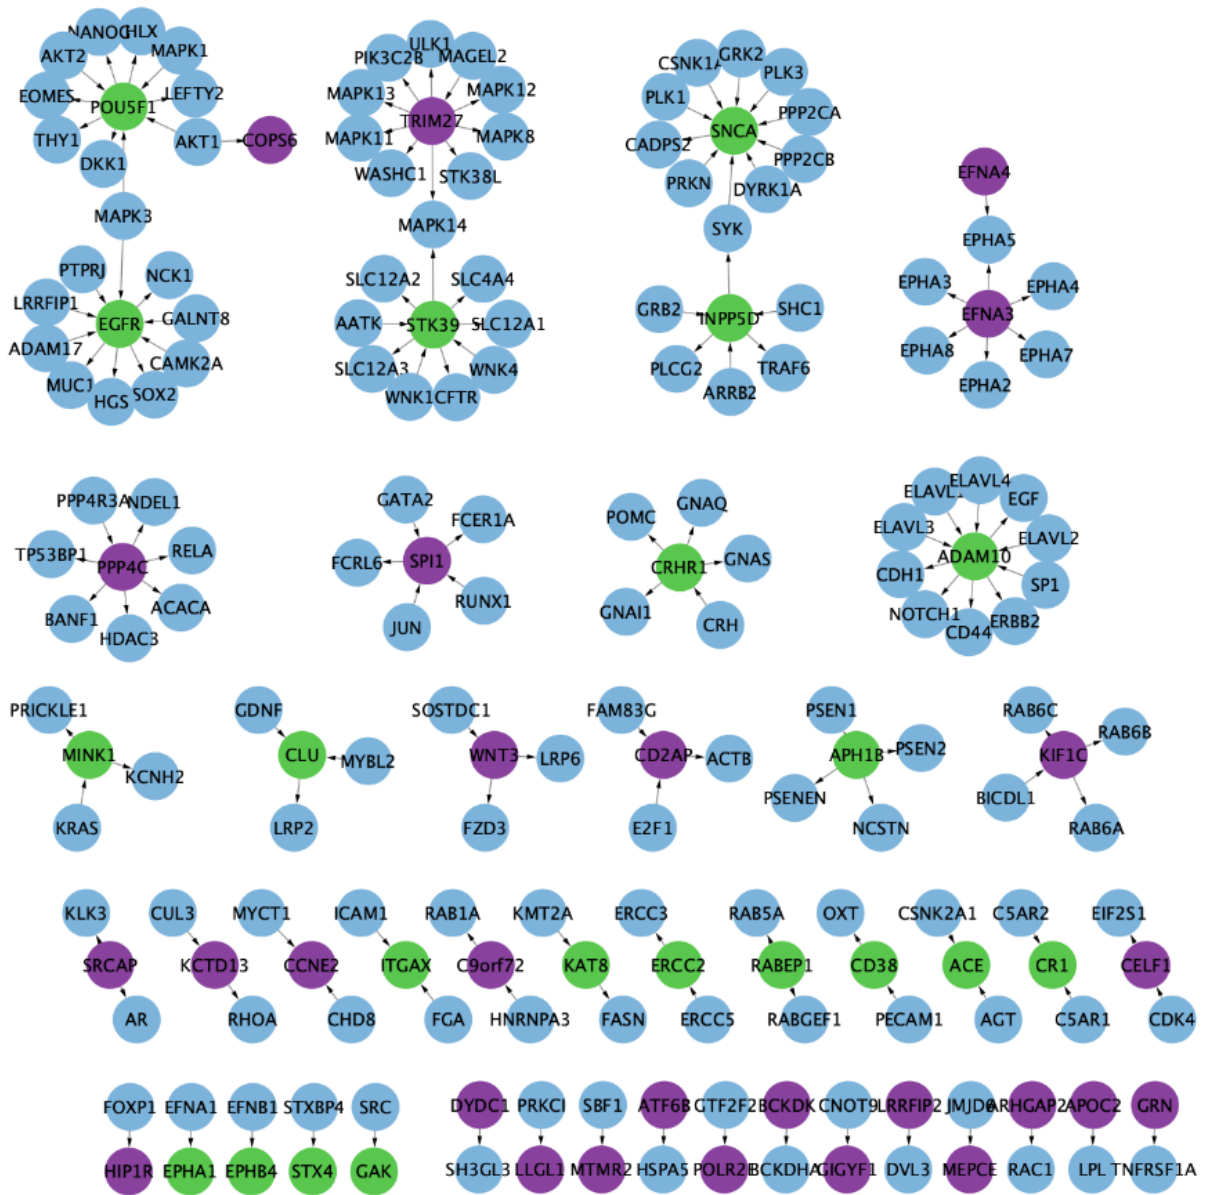

**Figure S1:** Network Visualization of *Novel* and *Difficult* genes companion genes Graph network visualization of both *novel* (green nodes) and *difficult* (purple nodes) genes and their SIGNOR curated partners (blue nodes). The direction of connecting arrows indicates interaction from regulator to target.

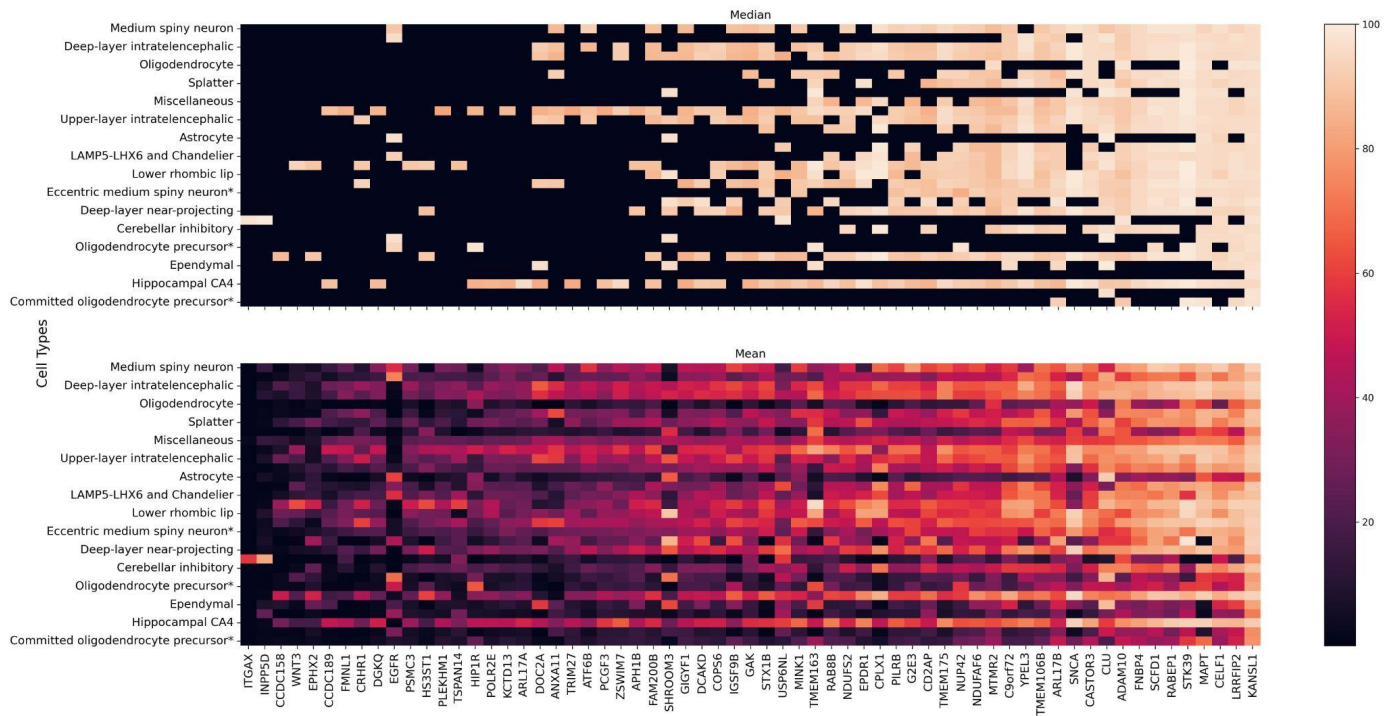

**Figure S2: scRNA-seq expression for significant genes ( $p_{\text{SMR\_multi}} < 2.95 \times 10^{-6}$  and  $p_{\text{HEIDI}} > 0.01$ ).** Heatmaps were used to illustrate both the median (top plot) and mean (bottom plot) expression percentile rank for each gene-celltype combination using significant genes and disease relevant cell types.

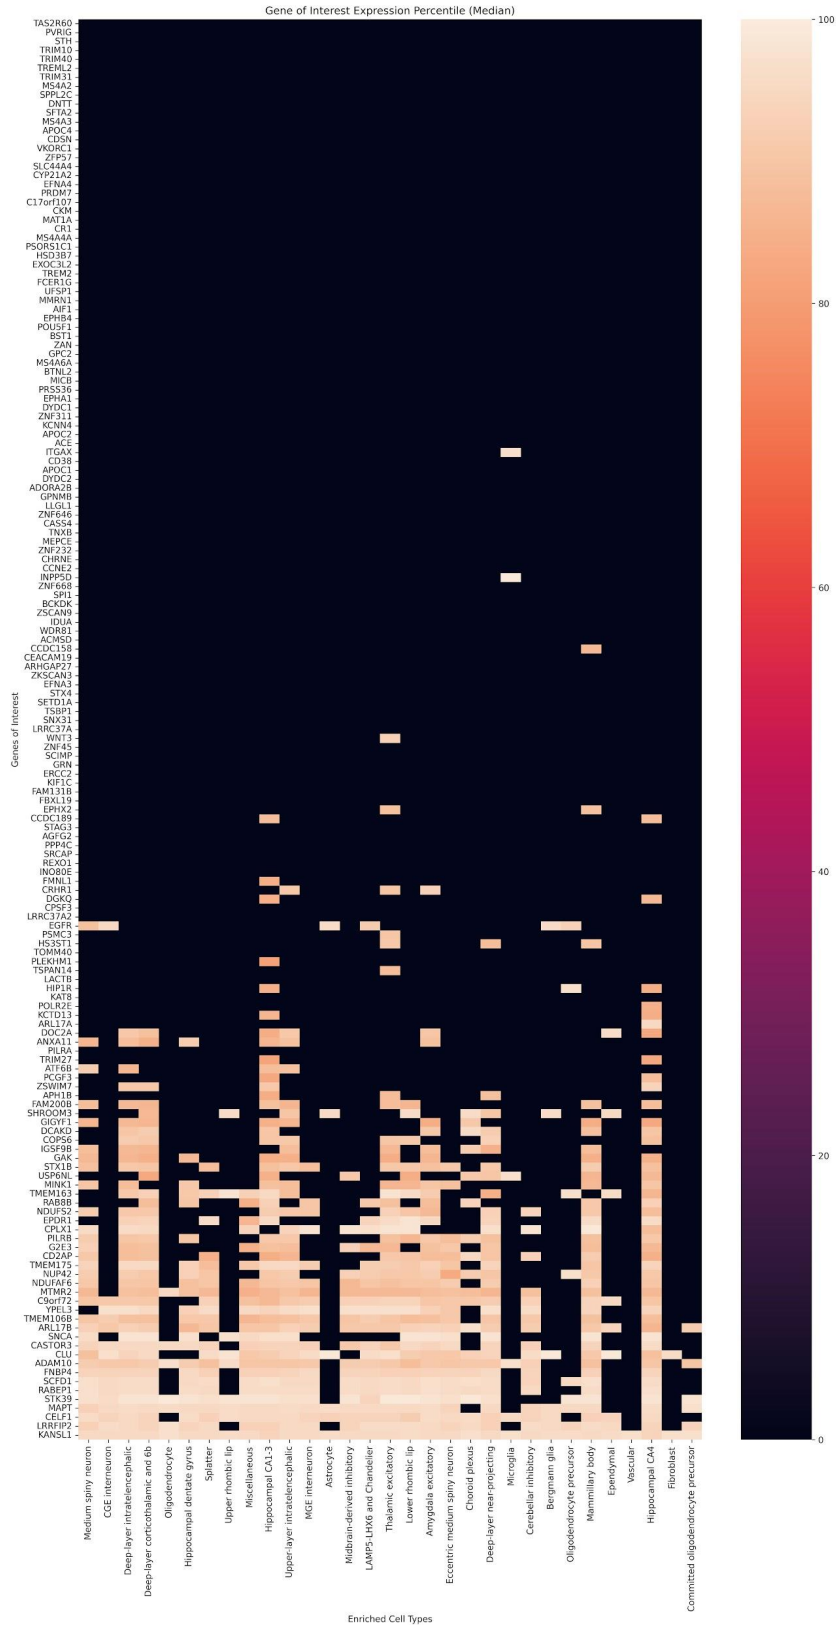

**Figure S3: Median scRNA-seq expression for all significant genes.** Heatmap illustration of the median expression percentile rank value for each gene-celltype combination.

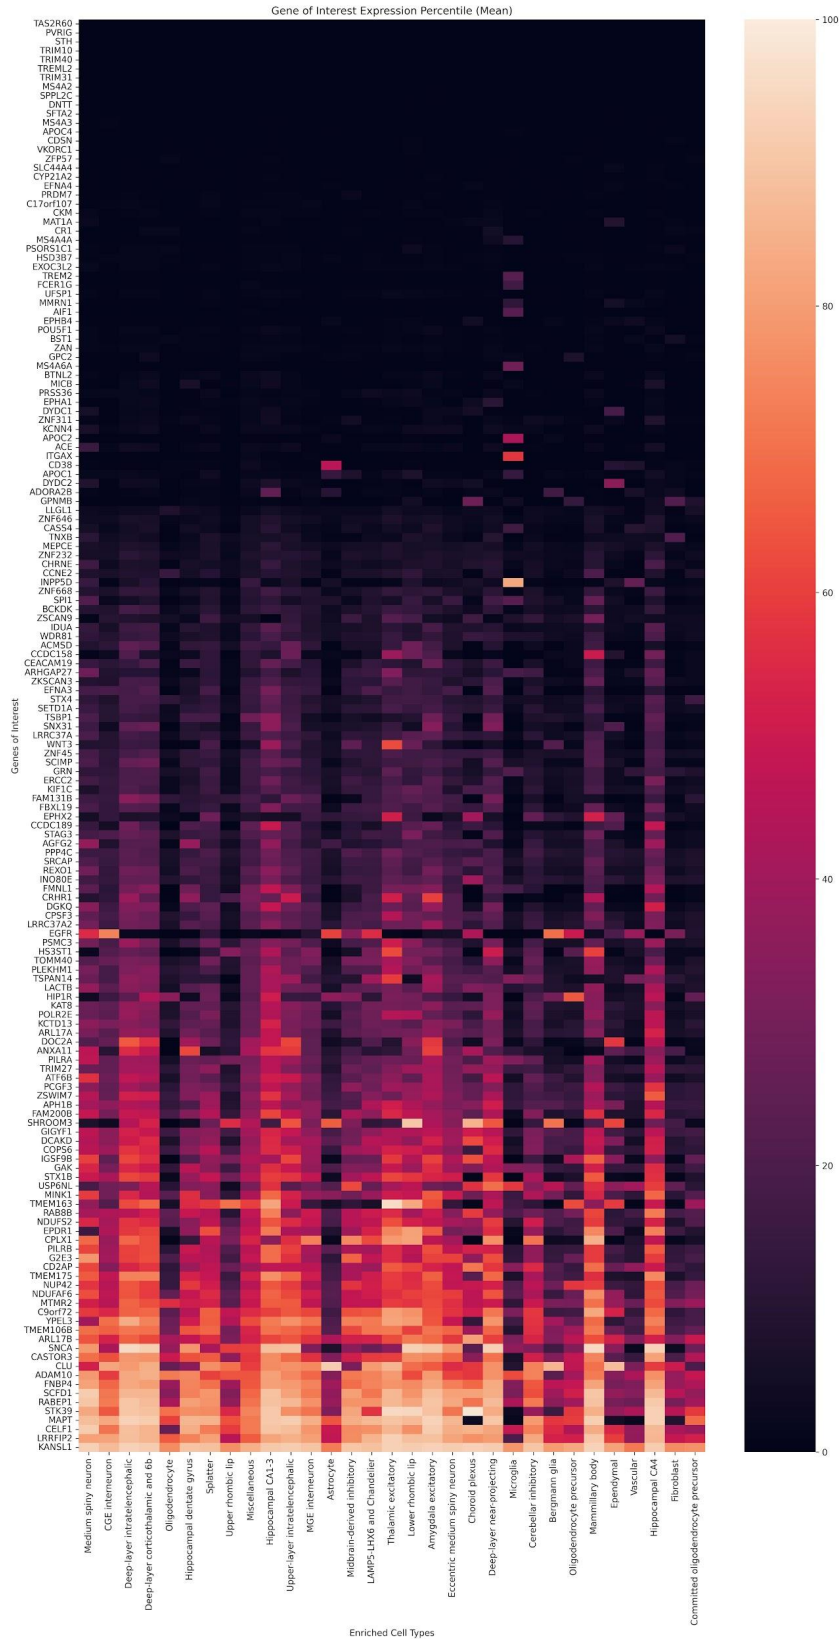

**Figure S4: Mean scRNA-seq expression for all significant genes.** Heatmap illustration of the mean expression percentile rank value for each gene-celltype combination.

| Disease                                                                                                                   | Total Genes (Unique)             | Liver Genes | Total eQTL Genes (non multi ancestry) | Replicated in Multi Ancestry | Total Therapeutic Genes | % Therapeutic       | Total Non-therapeutic Genes | % Non-therapeutic       |
|---------------------------------------------------------------------------------------------------------------------------|----------------------------------|-------------|---------------------------------------|------------------------------|-------------------------|---------------------|-----------------------------|-------------------------|
| <b>All Tested Genes (Protein Coding)</b>                                                                                  |                                  |             |                                       |                              |                         |                     |                             |                         |
| AD                                                                                                                        | 16833                            | 1597        | 15112                                 | 8404                         | 3,562                   | 21.2%               | 13,271                      | 78.8%                   |
| ALS                                                                                                                       | 16875                            | 1610        | 15163                                 | 8408                         | 3,565                   | 21.1%               | 13,310                      | 78.9%                   |
| FTLD                                                                                                                      | 16788                            | 1537        | 15038                                 | 8394                         | 3,551                   | 21.2%               | 13,237                      | 78.8%                   |
| LBD                                                                                                                       | 16797                            | 1540        | 15069                                 | 8388                         | 3,554                   | 21.2%               | 13,243                      | 78.8%                   |
| PD                                                                                                                        | 16872                            | 1596        | 15159                                 | 8407                         | 3,566                   | 21.1%               | 13,306                      | 78.9%                   |
| PSP                                                                                                                       | 16042                            | 1033        | 13839                                 | 8073                         | 3,420                   | 21.3%               | 12,622                      | 78.7%                   |
| <b>Significance p_SMR_multi &lt; 0.05 &amp; p_HEIDI &gt; 0.01</b>                                                         |                                  |             |                                       |                              |                         |                     |                             |                         |
| Disease                                                                                                                   | Total Significant Genes (Unique) |             | Total eQTL Genes (non multi ancestry) | Replicated in Multi Ancestry |                         | % Therapeutic + Sig |                             | % Non-therapeutic + Sig |
| AD                                                                                                                        | 8                                | 175         | 3189                                  | 2079                         | 1,142                   | 14275.0%            | 3,806                       | 47575.0%                |
| ALS                                                                                                                       | 3188                             | 83          | 1857                                  | 1260                         | 715                     | 22.4%               | 2,473                       | 77.6%                   |
| FTLD                                                                                                                      | 2318                             | 78          | 1243                                  | 810                          | 542                     | 23.4%               | 1,776                       | 76.6%                   |
| LBD                                                                                                                       | 2530                             | 82          | 1384                                  | 900                          | 580                     | 22.9%               | 1,950                       | 77.1%                   |
| PD                                                                                                                        | 3592                             | 108         | 2161                                  | 1434                         | 811                     | 22.6%               | 2,781                       | 77.4%                   |
| PSP                                                                                                                       | 2275                             | 30          | 1270                                  | 842                          | 574                     | 25.2%               | 1,701                       | 74.8%                   |
| <b>Significance p_SMR_multi &lt; 2.95E-06 (testing all protein coding genes) &amp; p_HEIDI &gt; 0.01</b>                  |                                  |             |                                       |                              |                         |                     |                             |                         |
| AD                                                                                                                        | 116                              | 2           | 68                                    | 7                            | 31                      | 26.7%               | 85                          | 73.3%                   |
| ALS                                                                                                                       | 3                                | 0           | 3                                     | 0                            | 0                       | 0.0%                | 3                           | 100.0%                  |
| FTLD                                                                                                                      | 0                                | 0           | 0                                     | 0                            | 0                       | 0.0%                | 0                           | 0.0%                    |
| LBD                                                                                                                       | 5                                | 0           | 1                                     | 0                            | 1                       | 20.0%               | 4                           | 80.0%                   |
| PD                                                                                                                        | 46                               | 3           | 33                                    | 5                            | 15                      | 32.6%               | 31                          | 67.4%                   |
| PSP                                                                                                                       | 9                                | 0           | 5                                     | 3                            | 2                       | 22.2%               | 7                           | 77.8%                   |
| <b>Significance p_SMR_multi &lt; 1.58E-08 (testing all protein coding genes across all omics) &amp; p_HEIDI &gt; 0.01</b> |                                  |             |                                       |                              |                         |                     |                             |                         |
| AD                                                                                                                        | 47                               | 1           | 19                                    | 19                           | 14                      | 29.8%               | 33                          | 70.2%                   |
| ALS                                                                                                                       | 1                                | 0           | 0                                     | 0                            | 0                       | 0.0%                | 1                           | 100.0%                  |
| FTLD                                                                                                                      | 0                                | 0           | 0                                     | 0                            | 0                       | 0.0%                | 0                           | 0.0%                    |
| LBD                                                                                                                       | 2                                | 0           | 0                                     | 0                            | 1                       | 50.0%               | 1                           | 50.0%                   |
| PD                                                                                                                        | 24                               | 1           | 14                                    | 14                           | 8                       | 33.3%               | 16                          | 66.7%                   |
| PSP                                                                                                                       | 8                                | 0           | 5                                     | 5                            | 2                       | 25.0%               | 6                           | 75.0%                   |



All protein coding associations can be download from this [link: https://drive.google.com/file/d/1I70F2UcEoKEFJYRM4LYtbsr61QP2VjAV/view?usp=share\\_link](https://drive.google.com/file/d/1I70F2UcEoKEFJYRM4LYtbsr61QP2VjAV/view?usp=share_link) (~200mb)

| Gene     | Omic                                          | Disease | topRSID    | beta, SMR | SE, SMR   | p, SMR       | p, multi-SNP SMR | p, HEIDI   | Diseases | Omic                                                                                                                                                                                                                                                                                                                                                                                 |
|----------|-----------------------------------------------|---------|------------|-----------|-----------|--------------|------------------|------------|----------|--------------------------------------------------------------------------------------------------------------------------------------------------------------------------------------------------------------------------------------------------------------------------------------------------------------------------------------------------------------------------------------|
| ARL17B   | Spinal cord eQTL                              | PD      | rs199451   | -0.202836 | 0.0332609 | 1.07E-09     | 6.42E-09         | 0.01223556 | AD       | Cerebellum eQTL, Cortex eQTL                                                                                                                                                                                                                                                                                                                                                         |
|          |                                               |         |            |           |           |              |                  |            | PD       | Spinalcord eQTL                                                                                                                                                                                                                                                                                                                                                                      |
| KAT8     | Tibial Nerve eQTL                             | PD      | rs9936329  | -0.428193 | 0.0892292 | 1.60E-06     | 3.76E-08         | 0.06971106 | AD       | Cerebellum eQTL, Whole Brain meta-analysis mQTL, Cerebellar Hemisphere eQTL, Cortex eQTL, Tibial Nerve eQTL, Skeletal Muscle eQTL, Hypothalamus eQTL, Whole Brain eQTL, Cerebellum eQTL                                                                                                                                                                                              |
|          |                                               |         |            |           |           |              |                  |            | PD       | Hippocampus eQTL, Cortex eQTL, Frontal Cortex BA9 eQTL, Prefrontal Cortex eQTL, Caudate Basal Ganglia eQTL, Skeletal Muscle eQTL, Hippocampus eQTL, Multi Ancestry Whole Brain Meta-analysis eQTL, Hypothalamus eQTL, Liver eQTL, Anterior Cingulate Cortex BA24 eQTL, Putamen Basal Ganglia eQTL, Amygdala eQTL, Whole Brain eQTL, Cerebellum eQTL, Nucleus Accumbens Basal Ganglia |
| LRRC37A2 | Multi Ancestry Whole Brain Meta-analysis eQTL | PD      | rs2532329  | -0.22263  | 0.0255896 | 3.32E-18     | 1.22E-15         | 0.4841153  | AD       | Basal Ganglia eQTL, Spinalcord eQTL, Frontal Cortex BA9 eQTL, Hippocampus eQTL, Multi Ancestry Whole Brain Meta-analysis eQTL, Substantia nigra eQTL, Liver eQTL, Putamen Basal Ganglia eQTL, Amygdala eQTL                                                                                                                                                                          |
|          |                                               |         |            |           |           |              |                  |            | PD       | Whole Brain meta-analysis mQTL, Whole Blood mQTL, Cortex eQTL, Multi Ancestry Whole Brain Meta-analysis eQTL                                                                                                                                                                                                                                                                         |
| KANSL1   | Whole Brain meta-analysis mQTL                | PD      | rs1966345  | 0.15927   | 0.0174497 | 7.02E-20     | 2.28E-19         | 0.06522781 | PSP      | Spinalcord eQTL, Whole Brain meta-analysis mQTL, Whole Blood mQTL                                                                                                                                                                                                                                                                                                                    |
|          |                                               |         |            |           |           |              |                  |            | AD       | Spinalcord eQTL, Whole Blood mQTL, Anterior Cingulate Cortex BA24 eQTL                                                                                                                                                                                                                                                                                                               |
| ARL17A   | Multi Ancestry Whole Brain Meta-analysis eQTL | PD      | rs58879558 | -0.337169 | 0.0385816 | 2.35E-18     | 3.03E-15         | 0.1614406  | PSP      | Multi Ancestry Whole Brain Meta-analysis eQTL, Hypothalamus eQTL                                                                                                                                                                                                                                                                                                                     |
|          |                                               |         |            |           |           |              |                  |            | AD       | Cerebellar Hemisphere eQTL, Cortex eQTL, Caudate Basal Ganglia eQTL, Hippocampus eQTL, Multi Ancestry Whole Brain Meta-analysis eQTL, Hypothalamus eQTL, Anterior Cingulate Cortex BA24 eQTL, Putamen Basal Ganglia eQTL, Cerebellum eQTL, Nucleus Accumbens Basal Ganglia                                                                                                           |
| PRSS36   | Whole Brain meta-analysis mQTL                | AD      | rs55667375 | 0.0928108 | 0.0167849 | 3.21E-08     | 6.46E-07         | 0.01582905 | AD       | Whole Brain meta-analysis mQTL, Cerebellar Hemisphere eQTL, Cortex eQTL, Multi Ancestry Whole Brain Meta-analysis eQTL, Whole Brain eQTL                                                                                                                                                                                                                                             |
|          |                                               |         |            |           |           |              |                  |            | PD       | Whole Brain meta-analysis mQTL                                                                                                                                                                                                                                                                                                                                                       |
| MAPT     | Whole Brain meta-analysis mQTL                | PSP     | rs1981997  | 1.14017   | 0.0815642 | 2.10E-44     | 2.10E-44         | 0.01425494 | AD       | Whole Brain meta-analysis mQTL, Whole Blood mQTL                                                                                                                                                                                                                                                                                                                                     |
|          |                                               |         |            |           |           |              |                  |            | PSP      | Whole Brain meta-analysis mQTL, Whole Blood mQTL                                                                                                                                                                                                                                                                                                                                     |
| IDUA     | Whole Brain meta-analysis mQTL                | PD      | rs6599388  | -0.134337 | 0.0147854 | 1.03E-19     | 1.87E-12         | 0.01914885 | LBD      | Whole Brain meta-analysis mQTL                                                                                                                                                                                                                                                                                                                                                       |
|          |                                               |         |            |           |           |              |                  |            | PD       | Whole Brain meta-analysis mQTL                                                                                                                                                                                                                                                                                                                                                       |
| TMEM175  | Whole Blood mQTL                              | PD      | rs11248057 | 0.495391  | 0.0721195 | 6.46E-12     | 4.33E-11         | 0.6479261  | LBD      | Whole Blood mQTL                                                                                                                                                                                                                                                                                                                                                                     |
|          |                                               |         |            |           |           |              |                  |            | PD       | Whole Blood mQTL, Multi Ancestry Whole Brain Meta-analysis eQTL                                                                                                                                                                                                                                                                                                                      |
| ARHGAP27 | Whole Blood mQTL                              | PSP     | rs11012    | 4.15654   | 0.543286  | 2.00E-14     | 1.36E-13         | 0.07969932 | AD       | Whole Brain meta-analysis mQTL, Whole Blood mQTL, Caudate Basal Ganglia eQTL, Nucleus Accumbens Basal Ganglia                                                                                                                                                                                                                                                                        |
|          |                                               |         |            |           |           |              |                  |            | PSP      | Whole Blood mQTL, Whole Blood eQTL eQTLgen                                                                                                                                                                                                                                                                                                                                           |
| CRHR1    | Whole Brain meta-analysis mQTL                | PSP     | rs12373139 | 1.79071   | 0.188188  | 1.81E-21     | 5.15E-18         | 0.2191273  | PD       | Whole Blood mQTL                                                                                                                                                                                                                                                                                                                                                                     |
|          |                                               |         |            |           |           |              |                  |            | PSP      | Whole Brain meta-analysis mQTL, Whole Blood mQTL, Cortex eQTL, Skeletal Muscle eQTL                                                                                                                                                                                                                                                                                                  |
| FMNL1    | Whole Blood mQTL                              | PSP     | rs17630064 | 0.247221  | 0.0717373 | 0.0005685207 | 7.24E-08         | 0.06396753 | AD       | Whole Brain meta-analysis mQTL, Whole Blood mQTL, Whole Blood mQTL                                                                                                                                                                                                                                                                                                                   |
|          |                                               |         |            |           |           |              |                  |            | PSP      | Multi Ancestry Whole Brain Meta-analysis eQTL                                                                                                                                                                                                                                                                                                                                        |
| PLEKHM1  | Skeletal Muscle eQTL                          | PD      | rs12947718 | -0.667265 | 0.0974424 | 7.50E-12     | 7.76E-12         | 0.03535971 | AD       | Cortex eQTL, Frontal Cortex BA9 eQTL, Prefrontal Cortex eQTL, Cortex eQTL, Caudate Basal Ganglia eQTL, Skeletal Muscle eQTL, Anterior Cingulate Cortex BA24 eQTL, Putamen Basal Ganglia eQTL, Whole Brain eQTL                                                                                                                                                                       |
|          |                                               |         |            |           |           |              |                  |            | PSP      | Anterior Cingulate Cortex BA24 eQTL                                                                                                                                                                                                                                                                                                                                                  |
| WNT3     | Cortex eQTL metaBrain                         | PD      | rs9904865  | -0.062473 | 0.0240469 | 0.009377936  | 1.37E-08         | 0.09647706 | AD       | Cortex eQTL metaBrain, Skeletal Muscle eQTL                                                                                                                                                                                                                                                                                                                                          |
|          |                                               |         |            |           |           |              |                  |            | PD       | Tibial Nerve eQTL                                                                                                                                                                                                                                                                                                                                                                    |
| SPPL2C   | Prefrontal Cortex eQTL                        | PD      | rs17577369 | 1.04066   | 0.182771  | 1.24E-08     | 1.30E-07         | 0.01842581 | AD       | Cerebellum eQTL                                                                                                                                                                                                                                                                                                                                                                      |
|          |                                               |         |            |           |           |              |                  |            | AD       | Prefrontal Cortex eQTL                                                                                                                                                                                                                                                                                                                                                               |

S6 - Genes Significant in 2 Diseases

| Gene                                          | Disease                                       | Omic                                          | probeID         | ProbeChr   | Probe_bp    | topRSID    | topSNP_chr | topSNP_bp | A1 | A2         | beta, SMR  | SE, SMR    | p, SMR   | p, multi-SNP SMR | p, HEIDI   |
|-----------------------------------------------|-----------------------------------------------|-----------------------------------------------|-----------------|------------|-------------|------------|------------|-----------|----|------------|------------|------------|----------|------------------|------------|
| ARL17B                                        | AD                                            | Cerebellum eQTL                               | ENSG00000228696 | 17         | 46361797    | rs7225002  | 17         | 44189067  | A  | G          | -0.0626033 | 0.0105364  | 2.82E-09 | 4.20E-07         | 0.5937533  |
|                                               |                                               | Cortex eQTL metaBrain                         | ENSG00000228696 | 17         | 46361797    | rs538628   | 17         | 44787313  | G  | C          | -0.0537127 | 0.00920295 | 5.33E-09 | 6.60E-08         | 0.6738135  |
|                                               | PD                                            | Spinalcord eQTL                               | ENSG00000228696 | 17         | 46361797    | rs199451   | 17         | 44801784  | G  | A          | -0.202836  | 0.0332609  | 1.07E-09 | 6.42E-09         | 0.01223556 |
| FMNL1                                         | AD                                            | Multi Ancestry Whole Brain Meta-analysis eQTL | ENSG00000184922 | 17         | 43298811    | rs62063276 | 17         | 44036408  | G  | T          | -0.134405  | 0.0271688  | 7.53E-07 | 2.21E-06         | 0.6697149  |
|                                               | PSP                                           | Whole Blood mQTL                              | cg19481029      | 17         | 43314586    | rs17630064 | 17         | 43289122  | G  | A          | 0.247221   | 0.0717373  | 5.69E-04 | 7.24E-08         | 0.06396753 |
| IDUA                                          | LBD                                           | Whole Brain meta-analysis mQTL                | cg08160350      | 4          | 996052      | rs6599388  | 4          | 939087    | C  | T          | -0.165404  | 0.030336   | 4.97E-08 | 2.81E-06         | 0.08410463 |
|                                               |                                               | Cortex eQTL metaBrain                         | ENSG00000127415 | 4          | 986997      | rs73211813 | 4          | 975238    | C  | T          | -0.435648  | 0.0846761  | 2.68E-07 | 2.39E-08         | 0.03864672 |
|                                               | Whole Blood eQTL GTX                          | ENSG00000127415                               | 4               | 980785     | rs11248061  | 4          | 980896     | A         | C  | -0.702144  | 0.152039   | 3.87E-06   | 4.08E-07 | 0.02435755       |            |
|                                               | Whole Blood mQTL                              | cg00247629                                    | 4               | 995263     | rs62294519  | 4          | 988619     | C         | T  | -0.487929  | 0.122202   | 6.53E-05   | 2.00E-08 | 0.05213469       |            |
|                                               |                                               | cg27494429                                    | 4               | 997540     | rs11248060  | 4          | 964359     | T         | C  | -0.486581  | 0.107127   | 5.57E-06   | 1.47E-07 | 0.07626291       |            |
|                                               |                                               | cg01962146                                    | 4               | 995931     | rs1051613   | 4          | 951179     | A         | G  | -0.165566  | 0.0343796  | 1.47E-06   | 8.18E-11 | 0.04819888       |            |
|                                               |                                               | cg08160350                                    | 4               | 996052     | rs6599388   | 4          | 939087     | C         | T  | -0.134337  | 0.0147854  | 1.03E-19   | 1.87E-12 | 0.01914885       |            |
|                                               |                                               | cg00187933                                    | 4               | 996785     | rs11248061  | 4          | 980896     | A         | C  | -0.235183  | 0.0490756  | 1.65E-06   | 3.55E-09 | 0.08509635       |            |
|                                               |                                               | cg15769764                                    | 4               | 996790     | rs11248061  | 4          | 980896     | A         | C  | -0.270404  | 0.0587199  | 4.12E-06   | 1.67E-07 | 0.09144947       |            |
|                                               |                                               | cg08332990                                    | 4               | 997351     | rs11248061  | 4          | 980896     | A         | C  | -0.248079  | 0.0525305  | 2.33E-06   | 1.16E-08 | 0.1446274        |            |
| Whole Brain meta-analysis mQTL                |                                               | ENSG00000103510                               | 16              | 31134894   | rs1060506   | 16         | 31133449   | T         | C  | -0.216715  | 0.0379747  | 1.15E-08   | 1.78E-07 | 0.1463961        |            |
| KAT8                                          | PD                                            | Whole Blood eQTL                              | cg02220965      | 16         | 31128310    | rs1978487  | 16         | 31129942  | C  | T          | 0.0603758  | 0.0130409  | 3.66E-06 | 2.55E-07         | 0.06856892 |
|                                               |                                               | Whole Brain eQTL                              | ENSG00000103510 | 16         | 31134894    | rs12597511 | 16         | 31145219  | T  | C          | -0.079204  | 0.0178323  | 8.93E-06 | 1.45E-06         | 0.2647209  |
|                                               | AD                                            | Whole Brain meta-analysis mQTL                | cg02220965      | 16         | 31128310    | rs4889619  | 16         | 31128615  | T  | C          | 0.0713321  | 0.0162194  | 1.09E-05 | 2.80E-07         | 0.1321537  |
|                                               | Cerebellar Hemisphere eQTL                    | ENSG00000103510                               | 16              | 31127075   | rs2855475   | 16         | 31147548   | A         | G  | -0.233509  | 0.051988   | 7.07E-06   | 3.28E-07 | 0.02523191       |            |
|                                               | Cerebellum eQTL                               | ENSG00000103510                               | 16              | 31114489   | rs1549293   | 16         | 31141993   | C         | T  | -0.17521   | 0.039031   | 7.16E-06   | 1.21E-06 | 0.04107506       |            |
|                                               | Cerebellum eQTL                               | ENSG00000103510                               | 16              | 31127075   | rs9972727   | 16         | 31149142   | G         | A  | -0.176591  | 0.0390447  | 6.10E-06   | 1.04E-06 | 0.0126411        |            |
|                                               | Cortex eQTL GTX                               | ENSG00000103510                               | 16              | 31127075   | rs1060506   | 16         | 31133449   | T         | C  | -0.189104  | 0.0477015  | 7.36E-05   | 6.68E-07 | 0.03828886       |            |
|                                               | Hypothalamus eQTL                             | ENSG00000103510                               | 16              | 31127075   | rs61162043  | 16         | 31114234   | G         | A  | -0.245687  | 0.0612799  | 6.09E-05   | 1.81E-06 | 0.2130376        |            |
|                                               | Skeletal Muscle eQTL                          | ENSG00000103510                               | 16              | 31127075   | rs9925964   | 16         | 31129895   | G         | A  | -0.390776  | 0.0836696  | 3.01E-06   | 1.57E-07 | 0.0538749        |            |
|                                               | Tibial Nerve eQTL                             | ENSG00000103510                               | 16              | 31127075   | rs9936329   | 16         | 31140799   | T         | G  | -0.428193  | 0.0892292  | 1.60E-06   | 3.76E-08 | 0.06971106       |            |
| LRR37A2                                       | PD                                            | Whole Brain eQTL                              | ENSG00000103510 | 16         | 31134894    | rs12597511 | 16         | 31145219  | T  | C          | -0.184809  | 0.0378713  | 1.06E-06 | 1.84E-07         | 0.04586272 |
|                                               |                                               | Whole Brain meta-analysis mQTL                | cg02220965      | 16         | 31128310    | rs4889619  | 16         | 31128615  | T  | C          | 0.170253   | 0.0349027  | 1.07E-06 | 2.55E-06         | 0.5369356  |
|                                               | AD                                            | Amygdala eQTL                                 | ENSG00000238083 | 17         | 44588877    | rs2942166  | 17         | 43715427  | C  | T          | -0.0465837 | 0.00988142 | 2.43E-06 | 2.54E-06         | 0.3929416  |
|                                               | Anterior Cingulate Cortex BA24 eQTL           | ENSG00000238083                               | 17              | 44588877   | rs56971664  | 17         | 43918613   | C         | T  | -0.0439728 | 0.00888721 | 5.50E-07   | 1.03E-06 | 0.6896415        |            |
|                                               | Caudate Basal Ganglia eQTL                    | ENSG00000238083                               | 17              | 44588877   | rs8073146   | 17         | 43893751   | G         | A  | -0.0431091 | 0.00859267 | 7.25E-07   | 2.96E-06 | 0.4893544        |            |
|                                               | Cerebellum eQTL                               | ENSG00000238083                               | 17              | 44588877   | rs17564020  | 17         | 43991781   | T         | G  | -0.0455583 | 0.0087789  | 2.11E-07   | 1.64E-06 | 0.8570875        |            |
|                                               | Cortex eQTL metaBrain                         | ENSG00000238083                               | 17              | 46511511   | rs2696466   | 17         | 44289832   | A         | G  | -0.0586461 | 0.00950285 | 6.77E-10   | 3.80E-08 | 0.8992366        |            |
|                                               | Frontal Cortex BA9 eQTL                       | ENSG00000238083                               | 17              | 44588877   | rs4074462   | 17         | 43855228   | T         | G  | -0.0430712 | 0.00872755 | 8.01E-07   | 1.50E-06 | 0.817564         |            |
|                                               | Hippocampus eQTL eQTLgen                      | ENSG00000238083                               | 17              | 46511511   | rs2696466   | 17         | 44289832   | A         | G  | -0.0644059 | 0.0125498  | 2.87E-07   | 2.88E-06 | 0.5139333        |            |
|                                               | Hippocampus eQTL GTX                          | ENSG00000238083                               | 17              | 44588877   | rs2942166   | 17         | 43715427   | C         | T  | -0.0431814 | 0.0089806  | 1.55E-06   | 2.25E-06 | 0.3720312        |            |
| PLEKHM1                                       | PD                                            | Hypothalamus eQTL                             | ENSG00000238083 | 17         | 44588877    | rs8073146  | 17         | 43893751  | G  | A          | -0.0404116 | 0.00803609 | 4.94E-07 | 1.59E-06         | 0.4894522  |
|                                               |                                               | Liver eQTL                                    | ENSG00000238083 | 17         | 44588877    | rs58879558 | 17         | 44095467  | C  | T          | -0.0659929 | 0.0128493  | 2.81E-07 | 1.90E-06         | 0.1531949  |
|                                               | Multi Ancestry Whole Brain Meta-analysis eQTL | ENSG00000238083                               | 17              | 44588877   | rs2532329   | 17         | 44350090   | A         | G  | -0.04872   | 0.00902299 | 6.86E-08   | 4.57E-08 | 0.9418131        |            |
|                                               | Nucleus Accumbens Basal Ganglia               | ENSG00000238083                               | 17              | 44588877   | rs413917    | 17         | 43723189   | A         | G  | -0.0432939 | 0.00858522 | 4.59E-07   | 6.97E-07 | 0.484854         |            |
|                                               | Prefrontal Cortex eQTL                        | ENSG00000238083                               | 17              | 44588877   | rs2696466   | 17         | 44289832   | A         | G  | -0.0902575 | 0.0151182  | 2.37E-09   | 1.22E-08 | 0.04836808       |            |
|                                               | Putamen Basal Ganglia eQTL                    | ENSG00000238083                               | 17              | 44588877   | rs55942528  | 17         | 43932028   | G         | A  | -0.0445283 | 0.00884181 | 4.75E-07   | 2.72E-06 | 0.7963627        |            |
|                                               | Skeletal Muscle eQTL                          | ENSG00000238083                               | 17              | 44588877   | rs4510068   | 17         | 44184828   | T         | G  | -0.0624675 | 0.0102461  | 1.08E-09   | 1.15E-07 | 0.4008675        |            |
|                                               | Whole Brain eQTL                              | ENSG00000238083                               | 17              | 44610946   | rs55825513  | 17         | 44176215   | A         | G  | 0.0046017  | 0.0076394  | 1.07E-07   | 4.35E-08 | 0.02762345       |            |
|                                               | Amygdala eQTL                                 | ENSG00000238083                               | 17              | 44588877   | rs2942166   | 17         | 43715427   | C         | T  | -0.233466  | 0.0328069  | 1.11E-12   | 7.92E-11 | 0.3625708        |            |
|                                               | Basal Ganglia eQTL                            | ENSG00000238083                               | 17              | 46511511   | rs199530    | 17         | 44836653   | G         | A  | -0.204835  | 0.0316577  | 9.78E-11   | 5.01E-10 | 0.01035425       |            |
| PRSS36                                        | PD                                            | Frontal Cortex BA9 eQTL                       | ENSG00000238083 | 17         | 44588877    | rs4074462  | 17         | 43855228  | T  | G          | -0.206808  | 0.027368   | 4.14E-14 | 8.74E-12         | 0.4723248  |
|                                               |                                               | Hippocampus eQTL GTX                          | ENSG00000238083 | 17         | 44588877    | rs2942166  | 17         | 43715427  | C  | T          | -0.216414  | 0.0290959  | 1.02E-13 | 1.43E-11         | 0.3236888  |
|                                               | Liver eQTL                                    | ENSG00000238083                               | 17              | 44588877   | rs58879558  | 17         | 44095467   | C         | T  | -0.273497  | 0.0391198  | 2.72E-12   | 1.24E-10 | 0.4739531        |            |
|                                               | Multi Ancestry Whole Brain Meta-analysis eQTL | ENSG00000238083                               | 17              | 44588877   | rs2532329   | 17         | 44350090   | A         | G  | -0.222633  | 0.0255896  | 3.32E-18   | 1.22E-15 | 0.4841153        |            |
|                                               | Putamen Basal Ganglia eQTL                    | ENSG00000238083                               | 17              | 44588877   | rs9897399   | 17         | 43804317   | G         | A  | -0.209757  | 0.027917   | 5.75E-14   | 1.07E-11 | 0.7115251        |            |
|                                               | Spinalcord eQTL                               | ENSG00000238083                               | 17              | 46511511   | rs58879558  | 17         | 44095467   | C         | T  | -0.223417  | 0.0357817  | 4.27E-10   | 4.69E-09 | 0.2679779        |            |
|                                               | Substantia nigra eQTL                         | ENSG00000238083                               | 17              | 44588877   | rs55974014  | 17         | 43757450   | A         | C  | -0.208719  | 0.0314696  | 3.30E-11   | 1.61E-09 | 0.5630928        |            |
|                                               | AD                                            | Anterior Cingulate Cortex BA24 eQTL           | ENSG00000225190 | 17         | 43513266    | rs55925547 | 17         | 43568007  | C  | T          | -0.565533  | 0.120734   | 2.81E-06 | 1.03E-06         | 0.3394405  |
|                                               | Caudate Basal Ganglia eQTL                    | ENSG00000225190                               | 17              | 43513266   | rs79172804  | 17         | 43828764   | A         | G  | -0.634594  | 0.119171   | 1.01E-07   | 2.22E-07 | 0.04643205       |            |
|                                               | Cortex eQTL GTX                               | ENSG00000225190                               | 17              | 43513266   | rs10445367  | 17         | 43932798   | T         | G  | -0.450407  | 0.0891061  | 4.31E-07   | 3.81E-09 | 0.03471772       |            |
| SPPL2C                                        | PD                                            | Cortex eQTL metaBrain                         | ENSG00000225190 | 17         | 45490749    | rs55925547 | 17         | 43568007  | C  | T          | -0.880801  | 0.155923   | 1.61E-08 | 2.82E-08         | 0.01207896 |
|                                               |                                               | Frontal Cortex BA9 eQTL                       | ENSG00000225190 | 17         | 43513266    | rs79172804 | 17         | 43828764  | A  | G          | -0.617712  | 0.125824   | 9.14E-07 | 1.19E-06         | 0.05384652 |
|                                               | Prefrontal Cortex eQTL                        | ENSG00000225190                               | 17              | 43588110   | rs79724577  | 17         | 43463493   | C         | A  | 1.20902    | 0.207821   | 5.97E-09   | 5.90E-09 | 0.01561697       |            |
|                                               | Putamen Basal Ganglia eQTL                    | ENSG00000225190                               | 17              | 43513266   | rs62065442  | 17         | 43563894   | C         | T  | -0.545119  | 0.106568   | 1.33E-07   | 2.87E-07 | 0.03026128       |            |
|                                               | Skeletal Muscle eQTL                          | ENSG00000225190                               | 17              | 43513266   | rs12947718  | 17         | 43493101   | A         | G  | -0.667265  | 0.0974424  | 7.50E-12   | 7.76E-12 | 0.03535971       |            |
|                                               | Whole Brain eQTL                              | ENSG00000225190                               | 17              | 43540690   | rs113434679 | 17         | 44126765   | A         | C  | 0.545968   | 0.111957   | 1.08E-06   | 7.17E-07 | 0.3130195        |            |
|                                               | PSP                                           | Anterior Cingulate Cortex BA24 eQTL           | ENSG00000225190 | 17         | 43513266    | rs11012    | 17         | 43513441  | T  | C          | 3.97818    | 0.768359   | 2.25E-07 | 8.50E-08         | 0.487497   |
|                                               | Cerebellar Hemisphere eQTL                    | ENSG00000178226                               | 16              | 31150246   | rs78924645  | 16         | 31154358   | A         | G  | -0.066351  | 0.0135831  | 1.04E-06   | 1.04E-06 | 0.5743859        |            |
|                                               | Cortex eQTL GTX                               | ENSG00000178226                               | 16              | 31150246   | rs1549299   | 16         | 31154146   | A         | G  | -0.0643026 | 0.012623   | 3.50E-07   | 1.83E-06 | 0.4465604        |            |
|                                               | Cortex eQTL metaBrain                         | ENSG00000178226                               | 16              | 31150068   | rs55667375  | 16         | 31155458   | C         | T  | -0.0957689 | 0.0165264  | 6.84E-09   | 2.42E-06 | 0.4249718        |            |
| Multi Ancestry Whole Brain Meta-analysis eQTL | ENSG00000178226                               | 16                                            | 31150246        | rs78924645 | 16          | 31154358   |            |           |    |            |            |            |          |                  |            |

| Omic                           | Disease | Gene    | probedID        | ProbeChr | ProbeBp  | topRSID     | topSNPChr | topSNPBp | A1 | A2 | beta, SMR  | SE, SMR    | p, SMR       | p, multi-SNP SMR | p, HEIDI   |
|--------------------------------|---------|---------|-----------------|----------|----------|-------------|-----------|----------|----|----|------------|------------|--------------|------------------|------------|
| Whole Brain meta-analysis mQTL | AD      | MAPT    | cg17569492      | 17       | 44026659 | rs17650872  | 17        | 44039516 | T  | G  | -0.0814127 | 0.0161079  | 4.32E-07     | 4.32E-07         | 0.6403735  |
| Whole Brain meta-analysis mQTL | AD      | MAPT    | cg05721485      | 17       | 44071124 | rs17651483  | 17        | 44058861 | A  | C  | -0.0392778 | 0.00714939 | 3.93E-08     | 1.26E-06         | 0.1842054  |
| Whole Brain meta-analysis mQTL | PD      | MAPT    | cg07163735      | 17       | 43971906 | rs55780945  | 17        | 44040120 | T  | C  | -0.485081  | 0.0918691  | 1.29E-07     | 1.29E-07         | 0.2039012  |
| Whole Brain meta-analysis mQTL | PD      | MAPT    | cg21327887      | 17       | 43971928 | rs56189701  | 17        | 43987801 | C  | T  | -0.428248  | 0.0761027  | 1.83E-08     | 1.83E-08         | 0.3550347  |
| Whole Brain meta-analysis mQTL | PD      | MAPT    | cg10780632      | 17       | 43973522 | rs9303523   | 17        | 43976684 | C  | T  | -0.190159  | 0.0331328  | 9.51E-09     | 1.65E-10         | 0.06329188 |
| Whole Brain meta-analysis mQTL | PD      | MAPT    | cg19156875      | 17       | 43974446 | rs17651507  | 17        | 44059010 | A  | T  | 0.232089   | 0.0584561  | 7.18E-05     | 1.83E-07         | 0.01714676 |
| Whole Brain meta-analysis mQTL | PD      | MAPT    | cg20888521      | 17       | 43977917 | rs17652121  | 17        | 44073973 | C  | T  | -0.157605  | 0.0173742  | 1.18E-19     | 4.13E-13         | 0.02329478 |
| Whole Brain meta-analysis mQTL | PD      | MAPT    | cg22291189      | 17       | 43978251 | rs17652121  | 17        | 44073973 | C  | T  | 0.157605   | 0.0173742  | 1.18E-19     | 4.73E-14         | 0.04416005 |
| Whole Brain meta-analysis mQTL | PD      | MAPT    | cg26019600      | 17       | 43978704 | rs62063859  | 17        | 44078616 | A  | G  | 0.53072    | 0.106841   | 6.79E-07     | 6.79E-07         | 0.1094086  |
| Whole Brain meta-analysis mQTL | PD      | MAPT    | cg12633764      | 17       | 43978756 | rs62063859  | 17        | 44078616 | A  | G  | 0.395332   | 0.0645481  | 9.09E-10     | 1.72E-09         | 0.1586649  |
| Whole Brain meta-analysis mQTL | PD      | MAPT    | cg05772917      | 17       | 44027251 | rs17650872  | 17        | 44039516 | T  | G  | -0.174153  | 0.0191833  | 1.10E-19     | 1.72E-13         | 0.01447168 |
| Whole Brain meta-analysis mQTL | PD      | MAPT    | cg21705961      | 17       | 44060775 | rs3785884   | 17        | 44057595 | A  | G  | 0.36317    | 0.0597238  | 1.20E-09     | 1.20E-09         | 0.1378246  |
| Whole Brain meta-analysis mQTL | PD      | MAPT    | cg07368061      | 17       | 44090862 | rs17574361  | 17        | 44108202 | G  | A  | 0.173968   | 0.0190538  | 6.83E-20     | 2.72E-13         | 0.06000518 |
| Whole Brain meta-analysis mQTL | PSP     | MAPT    | cg10224600      | 17       | 43975063 | rs1981997   | 17        | 44056767 | A  | G  | 1.14017    | 0.0815642  | 2.10E-44     | 2.10E-44         | 0.01425494 |
| Whole Brain meta-analysis mQTL | PSP     | MAPT    | cg20888521      | 17       | 43977917 | rs1981997   | 17        | 44056767 | A  | G  | 1.14017    | 0.0815642  | 2.10E-44     | 1.19E-31         | 0.08905337 |
| Whole Blood mQTL               | AD      | MAPT    | cg23202277      | 17       | 43971911 | rs17689882  | 17        | 43906828 | A  | G  | -0.130387  | 0.026718   | 1.06E-06     | 1.80E-06         | 0.04451087 |
| Whole Blood mQTL               | AD      | MAPT    | cg00891649      | 17       | 43972573 | rs111751251 | 17        | 44042951 | T  | C  | 0.0760692  | 0.0144379  | 1.37E-07     | 3.08E-07         | 0.07318684 |
| Whole Blood mQTL               | AD      | MAPT    | cg18878992      | 17       | 43974344 | rs17689882  | 17        | 43906828 | A  | G  | -0.0678265 | 0.0127858  | 1.13E-07     | 3.97E-07         | 0.0158721  |
| Whole Blood mQTL               | AD      | MAPT    | cg14202850      | 17       | 43974869 | rs117646503 | 17        | 43893260 | C  | T  | -0.128522  | 0.0263587  | 1.08E-06     | 6.88E-07         | 0.2207176  |
| Whole Blood mQTL               | AD      | MAPT    | cg24801230      | 17       | 43978533 | rs111751251 | 17        | 44042951 | T  | C  | 0.0343863  | 0.00628708 | 4.52E-08     | 1.81E-06         | 0.03870612 |
| Whole Blood mQTL               | AD      | MAPT    | cg18228076      | 17       | 43983362 | rs111751251 | 17        | 44042951 | T  | C  | 0.0369295  | 0.00676406 | 4.77E-08     | 9.45E-07         | 0.02969893 |
| Whole Blood mQTL               | AD      | MAPT    | cg02228913      | 17       | 44058016 | rs112572874 | 17        | 44072984 | G  | A  | 0.0385404  | 0.00711207 | 5.99E-08     | 2.08E-06         | 0.02802182 |
| Whole Blood mQTL               | AD      | MAPT    | cg00846647      | 17       | 44060252 | rs111751251 | 17        | 44042951 | T  | C  | 0.0461684  | 0.00851495 | 5.89E-08     | 6.76E-07         | 0.04804293 |
| Whole Blood mQTL               | AD      | MAPT    | cg21705961      | 17       | 44060775 | rs17689882  | 17        | 43906828 | A  | G  | 0.0721308  | 0.0136509  | 1.26E-07     | 2.53E-07         | 0.02723276 |
| Whole Blood mQTL               | AD      | MAPT    | cg01934064      | 17       | 44064242 | rs2532233   | 17        | 44273218 | T  | C  | -0.0982497 | 0.0191463  | 2.87E-07     | 4.34E-07         | 0.4999633  |
| Whole Blood mQTL               | AD      | MAPT    | cg07368061      | 17       | 44090862 | rs62056790  | 17        | 43975417 | A  | G  | 0.0645877  | 0.0119984  | 7.32E-08     | 3.12E-07         | 0.09065659 |
| Whole Blood mQTL               | AD      | MAPT    | cg09764761      | 17       | 44105544 | rs111541901 | 17        | 43994358 | T  | C  | 0.0724373  | 0.0134753  | 7.63E-08     | 2.69E-07         | 0.07306081 |
| Whole Blood mQTL               | PD      | MAPT    | cg23202277      | 17       | 43971911 | rs112995313 | 17        | 43795768 | C  | T  | -0.558183  | 0.0820831  | 1.04E-11     | 2.08E-10         | 0.1171783  |
| Whole Blood mQTL               | PD      | MAPT    | cg11909912      | 17       | 43974919 | rs112197756 | 17        | 44154105 | G  | A  | -1.03241   | 0.206365   | 5.65E-07     | 5.55E-07         | 0.1464477  |
| Whole Blood mQTL               | PD      | MAPT    | cg10224600      | 17       | 43975063 | rs112197756 | 17        | 44154105 | G  | A  | -0.789168  | 0.132521   | 2.60E-09     | 3.65E-08         | 0.2790191  |
| Whole Blood mQTL               | PSP     | MAPT    | cg05772917      | 17       | 44027251 | rs111012    | 17        | 43513441 | T  | C  | 5.23144    | 0.831232   | 3.10E-10     | 6.22E-11         | 0.1366316  |
| Skeletal Muscle eQTL           | PD      | ADORA2B | ENSG00000170425 | 17       | 15848231 | rs1045599   | 17        | 15879910 | T  | C  | 0.0810002  | 0.0161604  | 5.38E-07     | 2.73E-06         | 0.0173546  |
| Whole Blood eQTL eQTLgen       | AD      | KCNN4   | ENSG00000104783 | 19       | 44278047 | rs56681946  | 19        | 44283031 | C  | T  | -0.0500123 | 0.0145726  | 0.0005992623 | 1.01E-08         | 0.1526556  |

| Gene     | Diseases    | Omics                                                                                                                                                                                                                                                                                                                                                                                | Number of Omics | Network Partners                                                     | Number of Network Partners | Potential network toxicity issues | Gene     | Diseases    |
|----------|-------------|--------------------------------------------------------------------------------------------------------------------------------------------------------------------------------------------------------------------------------------------------------------------------------------------------------------------------------------------------------------------------------------|-----------------|----------------------------------------------------------------------|----------------------------|-----------------------------------|----------|-------------|
| ADAM10   | AD          | Whole Brain meta-analysis mQTL, Whole Blood eQTL eQTLgen                                                                                                                                                                                                                                                                                                                             | 2               | CDH1, NOTCH1, ERBB2, SP1, CD44, ELAVL1, EGF, ELAVL4, ELAVL2, ELAVL3  | 10                         | None in immediate network         | ADAM10   | AD          |
| SNCA     | LBD         | Whole Brain meta-analysis mQTL, Whole Blood mQTL, Whole Blood eQTL eQTLgen                                                                                                                                                                                                                                                                                                           | 3               | SYK, PPP2C2, CADPS2, PLK1, PRKN, CSNK1A1, PPP2CA, PLK3, DYRK1A, GRK2 | 10                         | None in immediate network         | SNCA     | LBD         |
| EGFR     | AD          | Whole Blood mQTL                                                                                                                                                                                                                                                                                                                                                                     | 2               | NCK1, LRRFIP1, MUC1, GALNT8, HGS, CAMK2A, PTPRJ, MAPK3, ADAM17, SOX2 | 10                         | None in immediate network         | POU5F1   | AD          |
| POU5F1   | AD          | Cortex eQTL metaBrain, Prefrontal Cortex eQTL                                                                                                                                                                                                                                                                                                                                        | 1               | DKK1, MAPK1, AKT1, NANOG, AKT2, MAPK3, LEFTY2, THY1, EOMES, HLX      | 10                         | None in immediate network         | EGFR     | AD          |
| STK39    | PD          | Whole Brain meta-analysis mQTL, Whole Blood mQTL                                                                                                                                                                                                                                                                                                                                     | 2               | MAPK14, CFTR, SLC4A4, WNK4, WNK1, SLC12A2, AATK, SLC12A3, SLC12A1    | 9                          | None in immediate network         | STK39    | PD          |
| INPP5D   | AD          | Whole Blood mQTL, Whole Blood eQTL eQTLgen, Whole Blood eQTL GTX                                                                                                                                                                                                                                                                                                                     | 3               | SHC1, ARRB2, PLCG2, SYK, TRAF6, GRB2                                 | 6                          | None in immediate network         | INPP5D   | AD          |
| CRHR1    | PD, PSP, AD | Whole Brain meta-analysis mQTL, Whole Blood mQTL, Cortex eQTL metaBrain, Skeletal Muscle eQTL                                                                                                                                                                                                                                                                                        | 4               | GNAS, GNAQ, CRH, GNAI1, POMC                                         | 5                          | None in immediate network         | CRHR1    | PD, PSP, AD |
| APH1B    | AD          | Cortex eQTL metaBrain, Tibial Nerve eQTL, Skeletal Muscle eQTL, Whole Blood eQTL eQTLgen                                                                                                                                                                                                                                                                                             | 4               | PSEN2, NCSTN, PSEN1, PSENEN                                          | 4                          | None in immediate network         | APH1B    | AD          |
| MINK1    | AD          | Whole Blood eQTL eQTLgen                                                                                                                                                                                                                                                                                                                                                             | 1               | KRAS, KCNH2, PRICKLE1                                                | 3                          | None in immediate network         | MINK1    | AD          |
| CLU      | AD          | Whole Brain meta-analysis mQTL                                                                                                                                                                                                                                                                                                                                                       | 1               | MYBL2, GDNF, LRP2                                                    | 3                          | None in immediate network         | CLU      | AD          |
| CR1      | AD          | Cerebellum eQTL, Basal Ganglia eQTL, Cortex eQTL metaBrain, Cortex eQTL GTX, Caudate Basal Ganglia eQTL, Whole Brain eQTL                                                                                                                                                                                                                                                            | 6               | CSAR1, CSAR2                                                         | 2                          | None in immediate network         | CR1      | AD          |
| ACE      | AD          | Whole Blood eQTL eQTLgen                                                                                                                                                                                                                                                                                                                                                             | 6               | CSNK2A1, AGT                                                         | 2                          | None in immediate network         | ITGAX    | PD          |
| CD38     | PD          | Cerebellum eQTL, Whole Brain meta-analysis mQTL, Whole Blood mQTL, Cerebellar Hemisphere eQTL, Cortex eQTL GTX, Tibial Nerve eQTL, Skeletal Muscle eQTL, Hypothalamus eQTL, Whole Blood eQTL eQTLgen, Whole Brain eQTL, Cerebellum eQTL                                                                                                                                              | 6               | OXT, PECAM1                                                          | 2                          | OXT - ALS                         | KAT8     | PD, AD      |
| RABEP1   | AD          | Whole Blood eQTL eQTLgen                                                                                                                                                                                                                                                                                                                                                             | 1               | RAB5A, RABGEF1                                                       | 2                          | None in immediate network         | ERCC2    | AD          |
| ERCC2    | AD          | Cerebellum eQTL, Whole Blood mQTL, Cortex eQTL metaBrain, Prefrontal Cortex eQTL, Whole Blood eQTL eQTLgen, Whole Brain eQTL                                                                                                                                                                                                                                                         | 1               | ERCC3, ERCC5                                                         | 2                          | None in immediate network         | ACE      | AD          |
| KAT8     | PD, AD      | Whole Blood eQTL eQTLgen                                                                                                                                                                                                                                                                                                                                                             | 11              | KMT2A, FASN                                                          | 2                          | None in immediate network         | RABEP1   | AD          |
| ITGAX    | PD          | Cortex eQTL metaBrain, Prefrontal Cortex eQTL, Cortex eQTL GTX, Caudate Basal Ganglia eQTL, Whole Brain eQTL, Nucleus Accumbens Basal Ganglia                                                                                                                                                                                                                                        | 1               | FGA, ICAM1                                                           | 2                          | None in immediate network         | CD38     | PD          |
| GAK      | PD          | Whole Brain eQTL, Skeletal Muscle eQTL                                                                                                                                                                                                                                                                                                                                               | 2               | SRC                                                                  | 1                          | None in immediate network         | STX4     | PD          |
| STX4     | PD          | Whole Blood mQTL                                                                                                                                                                                                                                                                                                                                                                     | 2               | STXB4                                                                | 1                          | None in immediate network         | EPHA1    | AD          |
| EPHB4    | AD          | Whole Blood eQTL eQTLgen                                                                                                                                                                                                                                                                                                                                                             | 1               | EFNB1                                                                | 1                          | None in immediate network         | EPHB4    | AD          |
| EPHA1    | AD          | Whole Brain meta-analysis mQTL, Whole Brain eQTL                                                                                                                                                                                                                                                                                                                                     | 1               | EFNA1                                                                | 1                          | None in immediate network         | GAK      | PD          |
| GNMB     | PD          | Skeletal Muscle eQTL, Whole Blood eQTL eQTLgen                                                                                                                                                                                                                                                                                                                                       | 14              | No curated network partners                                          | 0                          | None in immediate network         | VKORC1   | PD          |
| STAG3    | AD          | Whole Blood mQTL                                                                                                                                                                                                                                                                                                                                                                     | 14              | No curated network partners                                          | 0                          | None in immediate network         | CDSN     | AD          |
| CHRNE    | AD          | Whole Brain meta-analysis mQTL                                                                                                                                                                                                                                                                                                                                                       | 2               | No curated network partners                                          | 0                          | None in immediate network         | MAT1A    | AD          |
| NDUFS2   | AD          | Whole Blood mQTL                                                                                                                                                                                                                                                                                                                                                                     | 4               | No curated network partners                                          | 0                          | None in immediate network         | SLC44A4  | AD          |
| FCER1G   | AD          | Whole Brain meta-analysis mQTL                                                                                                                                                                                                                                                                                                                                                       | 3               | No curated network partners                                          | 0                          | None in immediate network         | EPHX2    | AD          |
| VKORC1   | PD          | Whole Blood mQTL                                                                                                                                                                                                                                                                                                                                                                     | 2               | No curated network partners                                          | 0                          | None in immediate network         | PSORS1C1 | AD          |
| DNTT     | AD          | Cerebellum eQTL, Whole Brain meta-analysis mQTL, Cortex eQTL metaBrain, Frontal Cortex BA9 eQTL, Prefrontal Cortex eQTL, Cortex eQTL GTX, Caudate Basal Ganglia eQTL, Multi-Ancestry Whole Brain Meta-analysis eQTL, Hypothalamus eQTL, Anterior Cingulate Cortex BA24 eQTL, Whole Blood eQTL eQTLgen, Putamen Basal Ganglia eQTL, Whole Brain eQTL, Nucleus Accumbens Basal Ganglia | 1               | No curated network partners                                          | 0                          | None in immediate network         | GNMB     | PD          |
| CKM      | AD          | Whole Brain meta-analysis mQTL                                                                                                                                                                                                                                                                                                                                                       | 1               | No curated network partners                                          | 0                          | None in immediate network         | MS4A2    | AD          |
| HSD3B7   | PD          | Whole Brain meta-analysis mQTL, Whole Blood mQTL, Cortex eQTL metaBrain, Frontal Cortex BA9 eQTL, Cerebellar Hemisphere eQTL, Caudate Basal Ganglia eQTL, Tibial Nerve eQTL, Hippocampus eQTL, Substantia nigra eQTL, Hypothalamus eQTL, Whole Blood eQTL eQTLgen, Amygdala eQTL, Cerebellum eQTL, Nucleus Accumbens Basal Ganglia                                                   | 2               | No curated network partners                                          | 0                          | None in immediate network         | STAG3    | AD          |
| BST1     | PD          | Whole Blood mQTL                                                                                                                                                                                                                                                                                                                                                                     | 1               | No curated network partners                                          | 0                          | None in immediate network         | MICB     | AD          |
| STX1B    | PD          | Whole Blood mQTL                                                                                                                                                                                                                                                                                                                                                                     | 1               | No curated network partners                                          | 0                          | None in immediate network         | STX1B    | PD          |
| PSMC3    | AD          | Whole Blood mQTL                                                                                                                                                                                                                                                                                                                                                                     | 1               | No curated network partners                                          | 0                          | None in immediate network         | PSMC3    | AD          |
| CDSN     | AD          | Whole Blood mQTL, Cortex eQTL GTX                                                                                                                                                                                                                                                                                                                                                    | 1               | No curated network partners                                          | 0                          | None in immediate network         | CHRNE    | AD          |
| MICB     | AD          | Whole Blood eQTL eQTLgen                                                                                                                                                                                                                                                                                                                                                             | 1               | No curated network partners                                          | 0                          | None in immediate network         | BST1     | PD          |
| MS4A2    | AD          | Prefrontal Cortex eQTL, Skeletal Muscle eQTL                                                                                                                                                                                                                                                                                                                                         | 1               | No curated network partners                                          | 0                          | None in immediate network         | HSD3B7   | PD          |
| PSORS1C1 | AD          | Whole Blood mQTL, Cortex eQTL metaBrain, Whole Blood eQTL eQTLgen, Whole Brain eQTL                                                                                                                                                                                                                                                                                                  | 1               | No curated network partners                                          | 0                          | None in immediate network         | NDUFS2   | AD          |
| EPHX2    | AD          | Whole Blood eQTL eQTLgen                                                                                                                                                                                                                                                                                                                                                             | 1               | No curated network partners                                          | 0                          | None in immediate network         | CKM      | AD          |
| SLC44A4  | AD          | Skeletal Muscle eQTL, Whole Blood eQTL eQTLgen, Whole Blood eQTL GTX                                                                                                                                                                                                                                                                                                                 | 1               | No curated network partners                                          | 0                          | None in immediate network         | FCER1G   | AD          |
| MAT1A    | AD          | Whole Blood eQTL eQTLgen                                                                                                                                                                                                                                                                                                                                                             | 1               | No curated network partners                                          | 0                          | None in immediate network         | DNTT     | AD          |
| FBXL19   | PD          | Whole Blood mQTL                                                                                                                                                                                                                                                                                                                                                                     | 1               | No curated network partners                                          | 0                          | None in immediate network         | FBXL19   | PD          |

| Source                           | Ancestry                | rsID      | Allele1 | Allele2 | Effect     | P-value  |
|----------------------------------|-------------------------|-----------|---------|---------|------------|----------|
| Wu et al. (2017)                 | Taiwanese               | rs3793947 | A       | n/a     | n/a        | 0.508    |
| Xu et al. (2016)                 | Chinese                 | rs156429  | A       | A       | n/a        | 0.108    |
| Rizig et al. (under preparation) | African & African Admix | rs1637190 | G       | A       | -0.0808    | 0.1338   |
|                                  |                         | rs858275  | C       | T       | -0.0824    | 0.125    |
|                                  |                         | rs858274  | C       | T       | -0.0522    | 0.5875   |
|                                  |                         | rs858239  | G       | A       | 0.0494     | 0.6099   |
|                                  |                         | rs199357  | G       | A       | -0.0271    | 0.6602   |
|                                  |                         | rs199355  | G       | A       | -0.0122    | 0.8008   |
|                                  |                         | rs199348  | C       | A       | -0.0042    | 0.931    |
|                                  |                         | rs199351  | C       | A       | -0.0335    | 0.7277   |
|                                  |                         | rs466240  | C       | T       | -0.0232    | 0.8135   |
|                                  |                         | rs858273  | C       | T       | 0.054      | 0.5768   |
| Present Study                    | multiancestry           | rs858275  | T       | C       | -0.107745  | 1.08E-08 |
|                                  | European                | rs1637190 | A       | G       | 0.124869   | 2.00E-07 |
|                                  |                         | rs199357  | A       | G       | 0.118241   | 9.66E-07 |
|                                  |                         | rs858239  | A       | G       | 0.24504    | 1.94E-08 |
|                                  |                         | rs199357  | A       | G       | 0.126337   | 2.20E-06 |
|                                  |                         | rs858273  | T       | C       | 0.128654   | 2.65E-06 |
|                                  |                         | rs199351  | C       | A       | 0.132703   | 2.88E-06 |
|                                  |                         | rs858273  | T       | C       | 0.155196   | 1.40E-06 |
|                                  |                         | rs858274  | T       | C       | 0.0887275  | 3.21E-08 |
|                                  |                         | rs199357  | A       | G       | 0.179231   | 1.88E-08 |
|                                  |                         | rs199348  | C       | A       | 0.117214   | 1.61E-08 |
|                                  |                         | rs199355  | G       | A       | -0.237456  | 1.94E-06 |
|                                  |                         | rs199357  | G       | A       | -0.181814  | 2.46E-07 |
|                                  |                         | rs199357  | G       | A       | -0.17763   | 5.79E-07 |
|                                  |                         | rs466240  | T       | C       | -0.078348  | 2.84E-08 |
|                                  |                         | rs199357  | G       | A       | -0.0900894 | 1.89E-08 |
|                                  |                         | rs199357  | G       | A       | -0.0901975 | 2.45E-08 |
|                                  |                         | rs199357  | A       | G       | 0.131601   | 1.20E-06 |
|                                  |                         | rs199357  | A       | G       | 0.121781   | 8.08E-07 |
